# Supplementary material for: A laboratory-based scoring system predicts early treatment in Rai 0 chronic lymphocytic leukemia
Source: PubMed Central journal article supplement — Haematologica. 2019 Oct 3;105(6):1613–20. doi: 10.3324/haematol.2019.228171 (PMC7271568; doi:10.3324/haematol.2019.228171), 2020-06
Supplement: 2019.228171.COHEN_SUPPL.pdf [file 2019.228171.COHEN_SUPPL.pdf]

## A laboratory-based scoring system predicts early treatment in Rai 0 chronic lymphocytic leukemia

Jared A. Cohen,<sup>1</sup> Francesca Maria Rossi,<sup>1</sup> Antonella Zucchetto,<sup>1</sup> Riccardo Bomben,<sup>1</sup> Lodovico Terzi-di-Bergamo,<sup>2</sup> Kari G. Rabe,<sup>3</sup> Massimo Degan,<sup>1</sup> Agostino Steffan,<sup>4</sup> Jerry Polesel,<sup>5</sup> Enrico Santinelli,<sup>6</sup> Idanna Innocenti,<sup>7</sup> Giovanna Cutrona,<sup>8</sup> Giovanni D'Arena,<sup>9</sup> Gabriele Pozzato,<sup>10</sup> Francesco Zaja,<sup>10</sup> Annalisa Chiarenza,<sup>11</sup> Davide Rossi,<sup>12,13</sup> Francesco Di Raimondo,<sup>11</sup> Luca Laurenti,<sup>7</sup> Massimo Gentile,<sup>14,15</sup> Fortunato Morabito,<sup>15,16</sup> Antonino Neri,<sup>17</sup> Manlio Ferrarini,<sup>18</sup> Christopher D. Fegan,<sup>19</sup> Christopher J. Pepper,<sup>19,20</sup> Giovanni Del Poeta,<sup>6</sup> Sameer A. Parikh,<sup>21</sup> Neil E. Kay<sup>21</sup> and Valter Gattei<sup>1</sup>

<sup>1</sup>Clinical and Experimental Onco-Haematology Unit, Centro di Riferimento Oncologico, I.R.C.C.S., Aviano (PN), Italy; <sup>2</sup>Institute of Oncology Research, Bellinzona, Switzerland; <sup>3</sup>Division of Biomedical Statistics and Informatics, Department of Health Sciences Research, Mayo Clinic, Rochester, MN, USA; <sup>4</sup>Immunopathology and Cancer Biomarkers, Centro di Riferimento Oncologico, I.R.C.C.S., Aviano (PN), Italy; <sup>5</sup>Unit of Cancer Epidemiology, Centro di Riferimento Oncologico, I.R.C.C.S., Aviano (PN), Italy; <sup>6</sup>Division of Haematology, S. Eugenio Hospital and University of Tor Vergata, Rome, Italy; <sup>7</sup>Hematology Institute, Catholic University of the Sacred Heart, Fondazione Policlinico A. Gemelli, Rome, Italy; <sup>8</sup>UO Molecular Pathology, Ospedale Policlinico San Martino IRCCS, Genova, Italy; <sup>9</sup>Onco-Haematology Department, Centro di Riferimento Oncologico della Basilicata, I.R.C.C.S., Rionero in Vulture, Italy; <sup>10</sup>Department of Internal Medicine and Haematology, Maggiore General Hospital, University of Trieste, Trieste, Italy; <sup>11</sup>Division of Haematology, Ferrarotto Hospital, Catania, Italy; <sup>12</sup>Hematology, Oncology Institute of Southern Switzerland, Bellinzona, Switzerland; <sup>13</sup>Università della Svizzera Italiana, Lugano, Switzerland; <sup>14</sup>Hematology Unit, AO, Cosenza, Italy; <sup>15</sup>Biotechnology Research Unit, Aprigliano, Cosenza, Italy; <sup>16</sup>Hematology Department and Bone Marrow Transplant Unit, Cancer Care Center, Augusta Victoria Hospital, East Jerusalem, Israel; and <sup>17</sup>Hematology Unit, Fondazione IRCCS Cà Granda Ospedale Maggiore Policlinico and University of Milan, Milan, Italy; <sup>18</sup>Department of Experimental Medicine, University of Genova, Genova, Italy; <sup>19</sup>Division of Cancer and Genetics, Cardiff University, School of Medicine, Heath Park, Cardiff, UK; <sup>20</sup>University of Sussex, Brighton and Sussex Medical School, Brighton, UK and <sup>21</sup>Division of Hematology, Department of Medicine, Mayo Clinic, Rochester, MN, USA

©2020 Ferrata Storti Foundation. This is an open-access paper. doi:10.3324/haematol.2019.228171

Received: June 3, 2019.

Accepted: October 2, 2019.

Pre-published: October 3, 2019.

Correspondence: JARED A. COHEN - jcoen781@gmail.com

VALTER GATTEI - vgattei@cro.it

## Supplemental Materials for

### A Laboratory-Based Scoring System Predicts Early Treatment in Rai 0 Chronic Lymphocytic Leukemia

#### Supplemental information:

##### • Supplemental Tables:

- o Supplemental Table 1. Clinical and laboratory features of CLL patients.
- o Supplemental Table 2. Treatment free survival in CLL cases identified as high-risk according to the CRO model, stratified by score (N=309).
- o Supplemental Table 3. UVA/MVA in 304/478 cases from the training cohort with available *TP53* and *NOTCH1* gene mutational status.

##### • Supplemental Figures:

- o Supplemental Figure 1. Establishing a WBC count cutoff.
- o Supplemental Figure 2. WBC frequencies in the training cohort.
- o Supplemental Figure 3. Risk group determination.
- o Supplemental Figure 4. Comparison to CLL-IPI.
- o Supplemental Figure 5. Overall treatment free survival in all cohorts.
- o Supplemental Figure 6. Comparison of CRO score and CLL-IPI in the composite cohort.
- o Supplemental Figure 7. Treatment free survival in all high-risk cases determined according to the CRO score.
- o Supplemental Figure 8. Treatment free survival in Rai I cases determined according to the CRO score.

**Supplemental Table 1.** Clinical and laboratory features of CLL patients.

| <b>Parameter</b>                          | <b>n/total cases (%)</b> |                |                |                |               |
|-------------------------------------------|--------------------------|----------------|----------------|----------------|---------------|
|                                           | <b>Training</b>          | <b>Gemelli</b> | <b>Cardiff</b> | <b>Mayo</b>    | <b>O-CLL</b>  |
| Age $\geq$ 65, years                      | 254/478 (53.1)           | 92/144 (63.9)  | 225/395 (60.0) | 241/540 (44.6) | 97/322 (30.1) |
| WBC count $>32 \times 10^3$ cell/ $\mu$ L | 141/478 (29.5)           | 5/144 (3.5)    | 110/395 (27.8) | 92/540 (17.0)  | 29/322 (9.0)  |
| IGHV unmutated                            | 94/478 (19.7)            | 35/144 (25.3)  | 83/395 (21.0)  | 178/540 (33.0) | 97/322 (30.1) |
| FISH category                             |                          |                |                |                |               |
| del17p                                    | 30/478 (6.3)             | 3/144 (2.1)    | 17/395 (4.3)   | 18/540 (3.3)   | 6/322 (1.9)   |
| del11q                                    | 36/478 (7.5)             | 6/144 (4.2)    | 32/395 (8.1)   | 38/540 (7.0)   | 18/322 (5.6)  |
| tri12                                     | 67/478 (14.0)            | 14/144 (9.7)   | 39/395 (9.9)   | 59/540 (10.9)  | 38/322 (11.8) |
| Beta-2-microglobulin $>3.5$ mg/L          | 36/418 (8.6)             | 21/144 (14.6)  | 92/395 (23.3)  | 70/540 (13.0)  | 1/239 (0.4)   |
| Follow-up median, months (95%CI)          | 62 (57-68)               | 91 (83-103)    | 94 (83-104)    | 77 (68-88)     | 89 (85-95)    |

FISH categories were as reported by Dohner et al (Dohner H, N Engl J Med. 2000;343:1910-6). Abbreviations: WBC, white blood cell.

**Supplemental Table 2.** Treatment free survival in CLL cases identified as high-risk according to the CRO model, stratified by score (N=309).

| <b>CRO score</b> | <b>Median, months</b> | <b>95% CI, months</b> |
|------------------|-----------------------|-----------------------|
| 3                | 57.6                  | 45.9-68.0             |
| 4                | 44.0                  | 36.0-64.0             |
| 5                | 28.0                  | 14.7-29.1             |
| Overall          | 51.6                  | 42.6-60.0             |

CLL cases were taken from the training and validation cohorts. Abbreviations: CI, confidence interval.

**Supplemental Table 3:** Subgroup univariable and reduced multivariable analysis involving 304/478 cases from the training cohort with available TP53 and NOTCH1 gene mutational status.

| Factor                 | Univariable Analysis |      |           | Reduced Multivariable Analysis |      |           |
|------------------------|----------------------|------|-----------|--------------------------------|------|-----------|
|                        | P                    | HR   | 95% CI    | P                              | HR   | 95% CI    |
| WBC>32K cells/ $\mu$ L | <0.0001              | 2.69 | 1.80-4.00 | 0.0009                         | 2.02 | 1.33-3.06 |
| Dohner category        |                      |      |           |                                |      |           |
| del11q                 | <0.0001              | 4.25 | 2.41-7.49 | 0.0234                         | 1.95 | 1.09-3.47 |
| tri12                  | 0.0001               | 2.75 | 1.67-4.53 | 0.0130                         | 1.94 | 1.15-3.28 |
| UM IGHV                | <0.0001              | 3.98 | 2.64-5.98 | <0.0001                        | 2.57 | 1.64-4.04 |
| TP53 disrupted         | <0.0001              | 3.12 | 1.97-4.94 | 0.0086                         | 2.01 | 1.94-3.39 |
| Del17p                 | <0.0001              | 4.00 | 2.12-7.55 |                                |      |           |
| TP53 mutated           | <0.0001              | 3.33 | 2.07-5.38 |                                |      |           |
| CD49d+                 | 0.0022               | 1.85 | 1.25-2.75 |                                |      |           |
| NOTCH1 mutated         | 0.0003               | 2.25 | 1.45-3.48 |                                |      |           |
| Age >65 years          | 0.0818               | 1.42 | 0.96-2.12 |                                |      |           |
| Male                   | 0.9251               | 1.02 | 0.69-1.51 |                                |      |           |

FISH categories were as reported by Dohner et al (ref. 7). Abbreviations: HR, hazard ratio; CI, confidence interval; WBC, white blood cell; UM, unmutated.

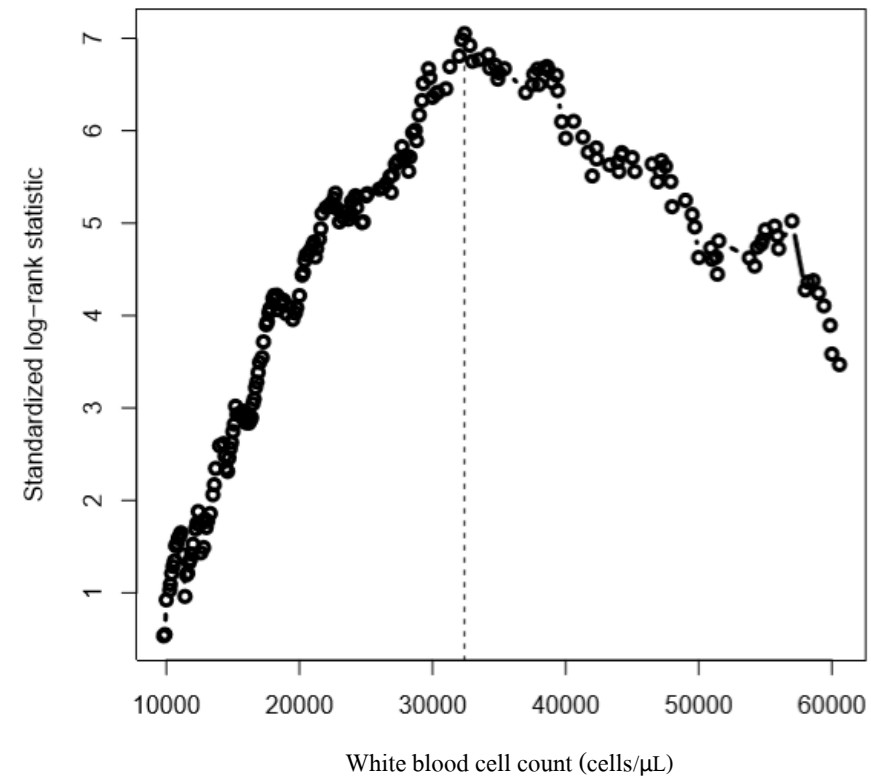

**Supplementary Figure 1. Establishing a WBC count cutoff.** Maximally selected log-rank statistic establishing a WBC count >32K cells/μL as our threshold.

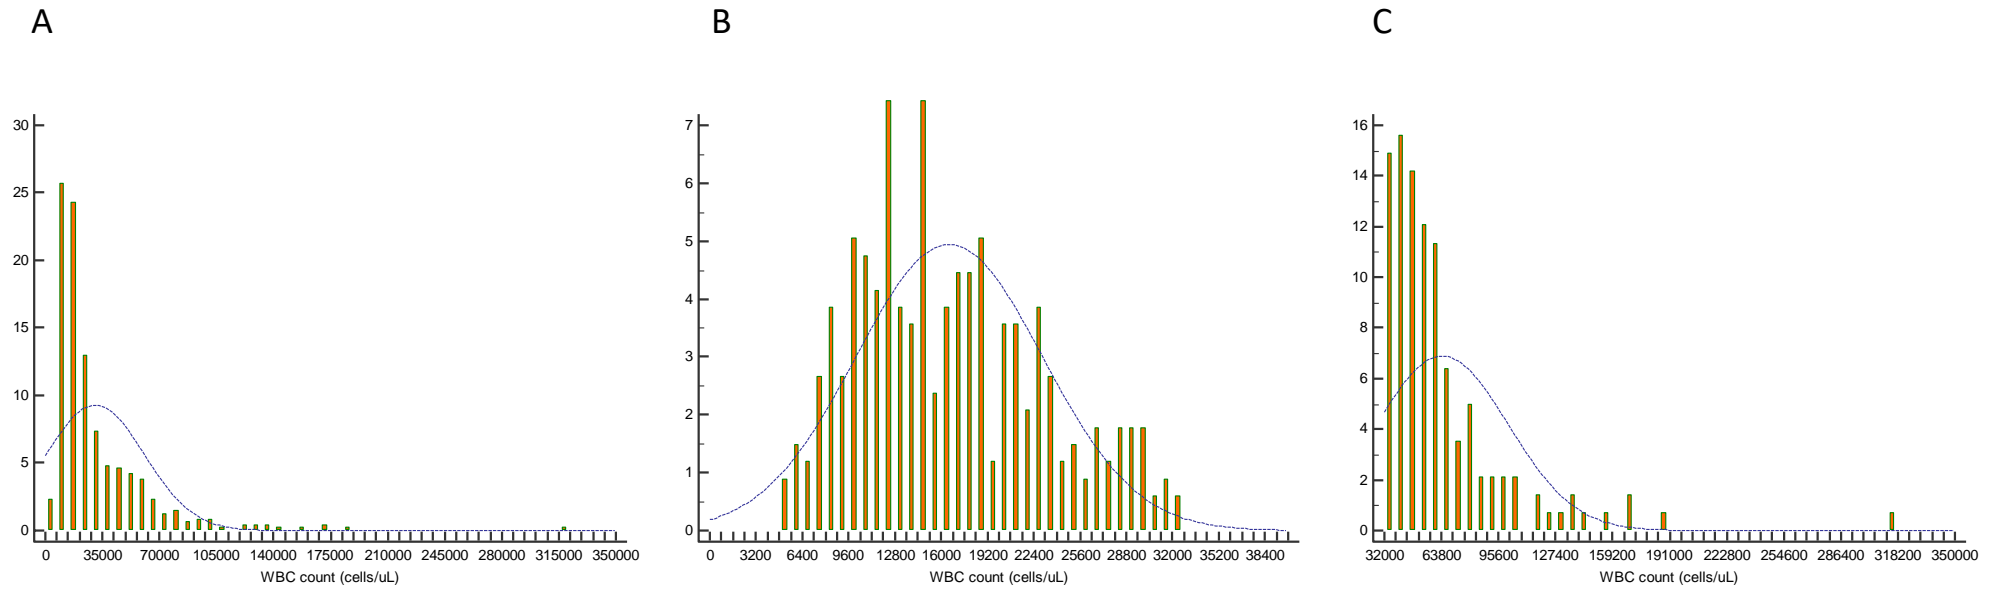

**Supplementary Figure 2. Distribution plots demonstrating WBC count frequencies in the training cohort.** Histogram of WBC count frequencies in (A) all 478 cases comprising the training cohort (B) cases with WBC count  $\leq 32 \times 10^3$  and (C) cases with WBC count  $> 32 \times 10^3$  cell/ $\mu$ L.

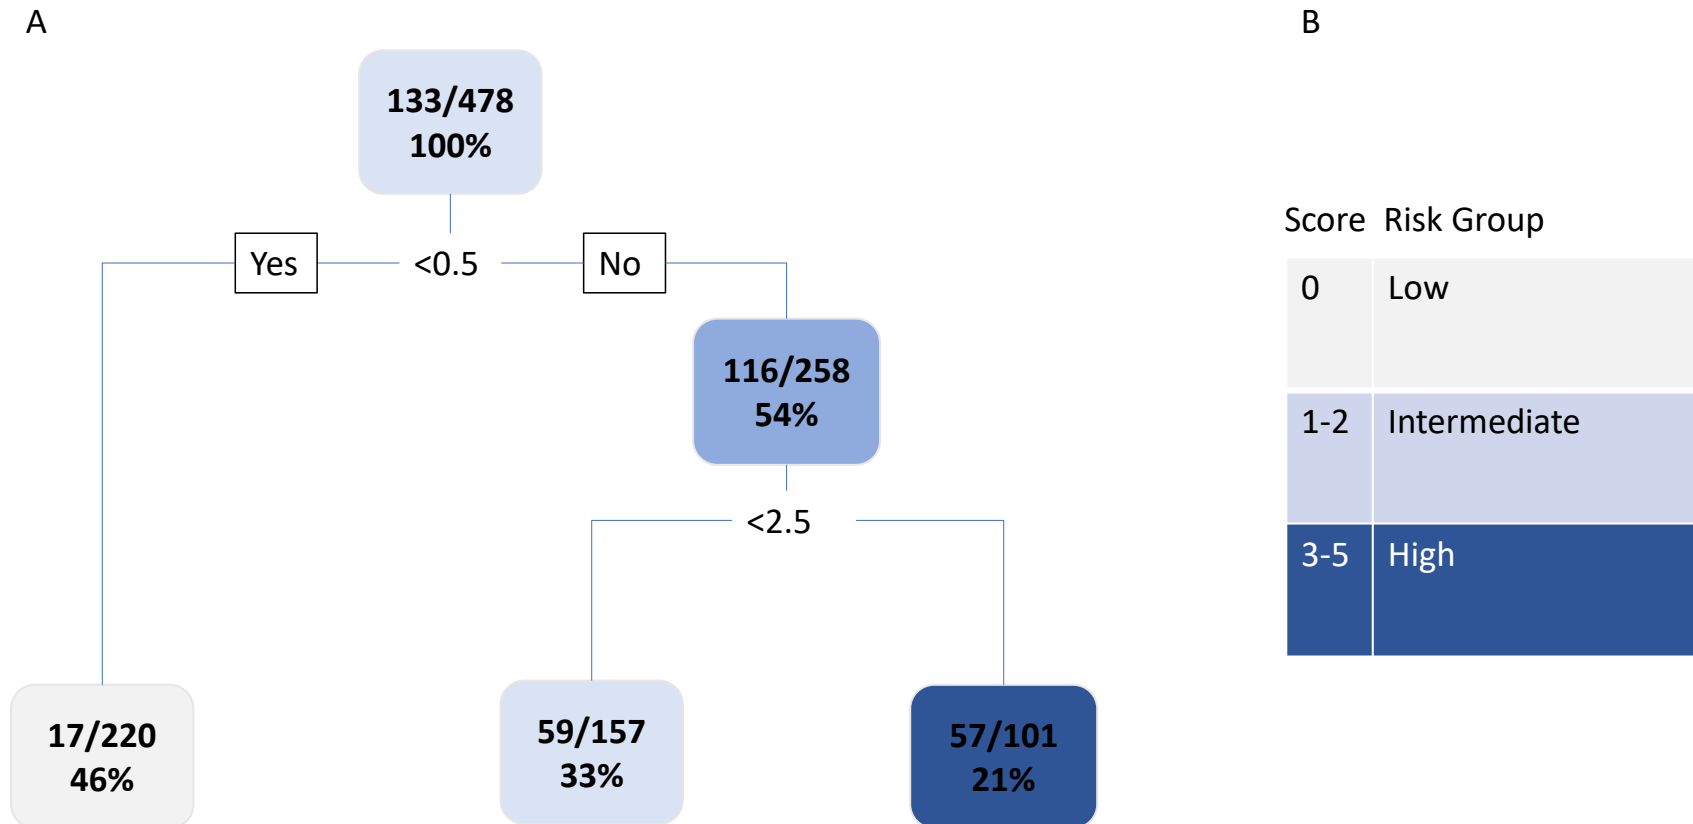

**Supplementary Figure 3. Risk group determination.** A) Recursive partitioning demonstrating 2 cut-offs at  $<0.5$  and  $<2.5$  (within nodes, # of events/cases and % of total cases reported). B) Risk group categorization into low (0) intermediate (1-2) and high (3-5).



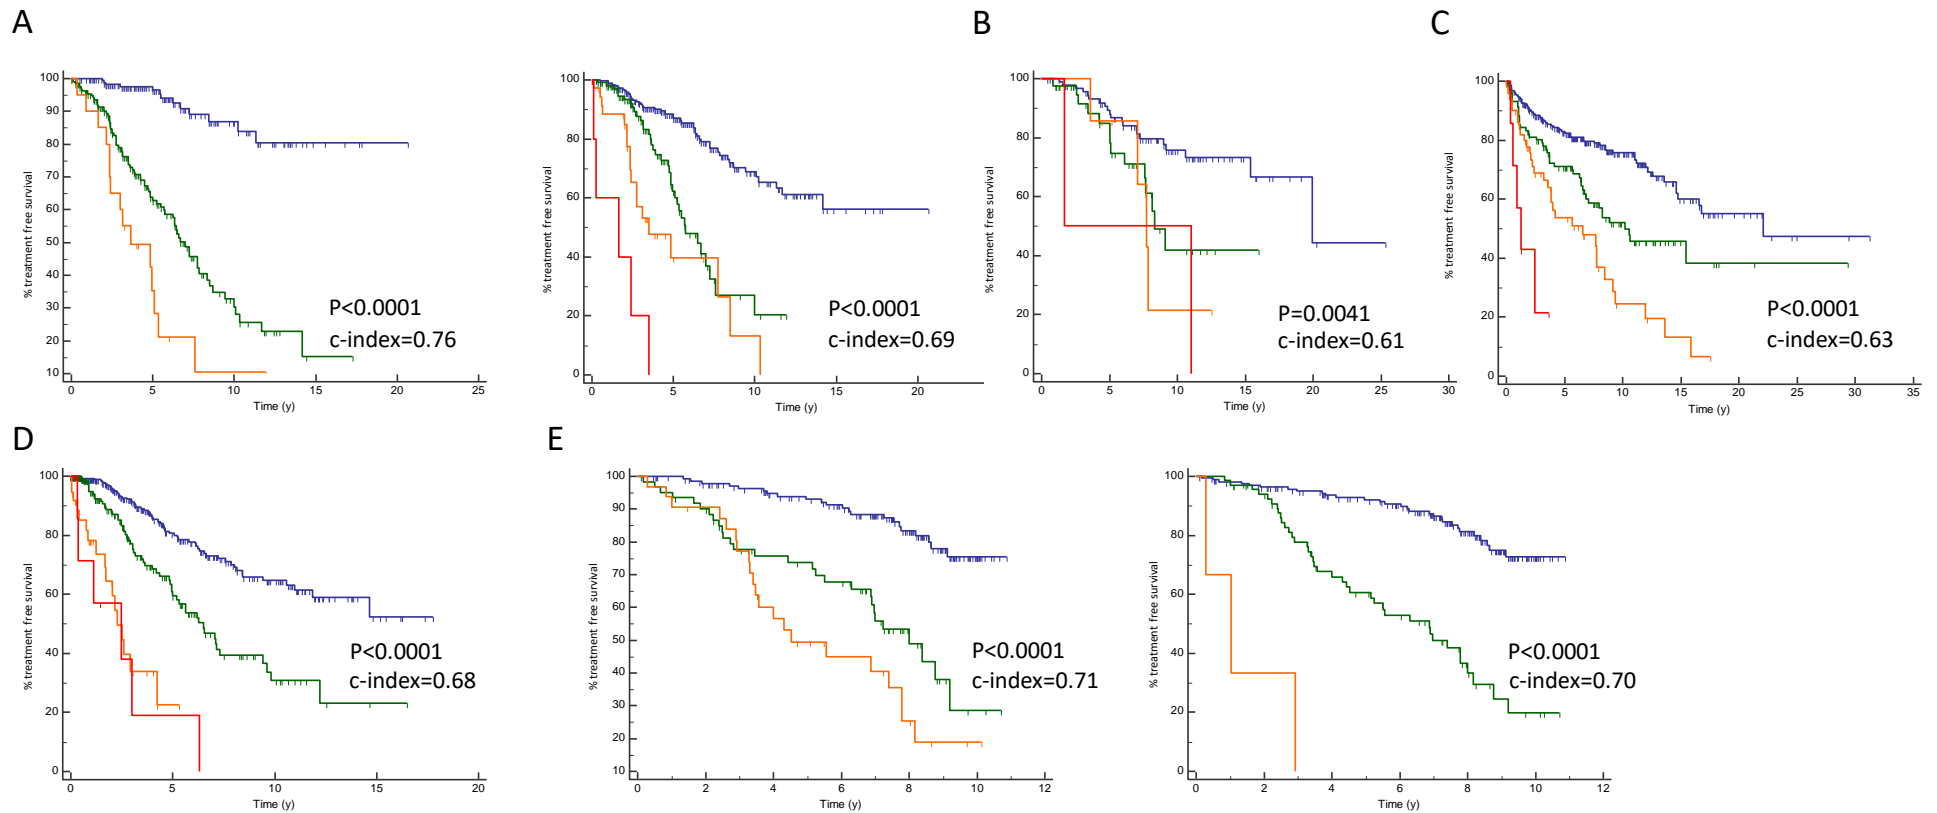

**Supplementary Figure 4. Comparison to CLL-IPI.** Kaplan-Meier curves demonstrating treatment free survival (%; Y-axis) in: (A) the training cohort (left panel, CRO score; right panel, CLL-IPI); (B) the Gemelli validation cohort (CLL-IPI; the corresponding CRO score is reported in Figure 3A); (C) the Cardiff cohort (CLL-IPI; the corresponding CRO score is reported in Figure 3B); (D) the Mayo cohort (CLL-IPI) the corresponding CRO score is reported in Figure 3C); (E) the O-CLL cohort (left panel, CRO score; right panel, CLL-IPI). Blue: low-risk category, green: moderate-risk category, orange: high-risk category, red: very high-risk category (CLL-IPI only); x axis: time in years.

A

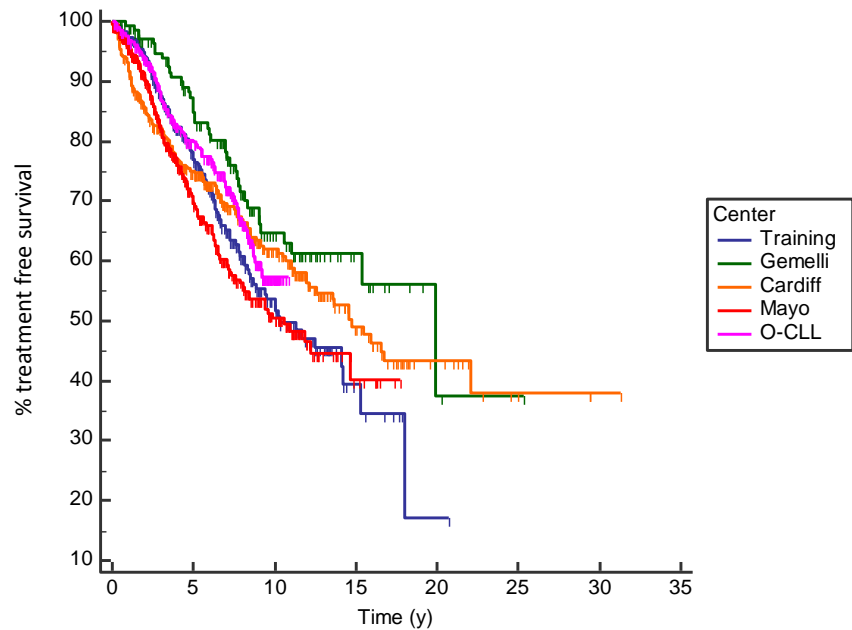

B

|          | Mayo   | Training | O-CLL | Cardiff | Gemelli |
|----------|--------|----------|-------|---------|---------|
| Mayo     | --     | --       | --    | --      | --      |
| Training | 0.15   | --       | --    | --      | --      |
| O-CLL    | 0.01   | 0.25     | --    | --      | --      |
| Cardiff  | 0.12   | 0.55     | 0.66  | --      | --      |
| Gemelli  | 0.0007 | 0.0047   | 0.15  | 0.06    | --      |

**Supplementary Figure 5. Overall treatment free survival in all cohorts.** A) Kaplan-Meier curves demonstrating treatment free survival (%; Y-axis) for the training and 4 validation cohorts. B) Statistical significance (P-value) comparing median treatment free survivals between all cohorts.

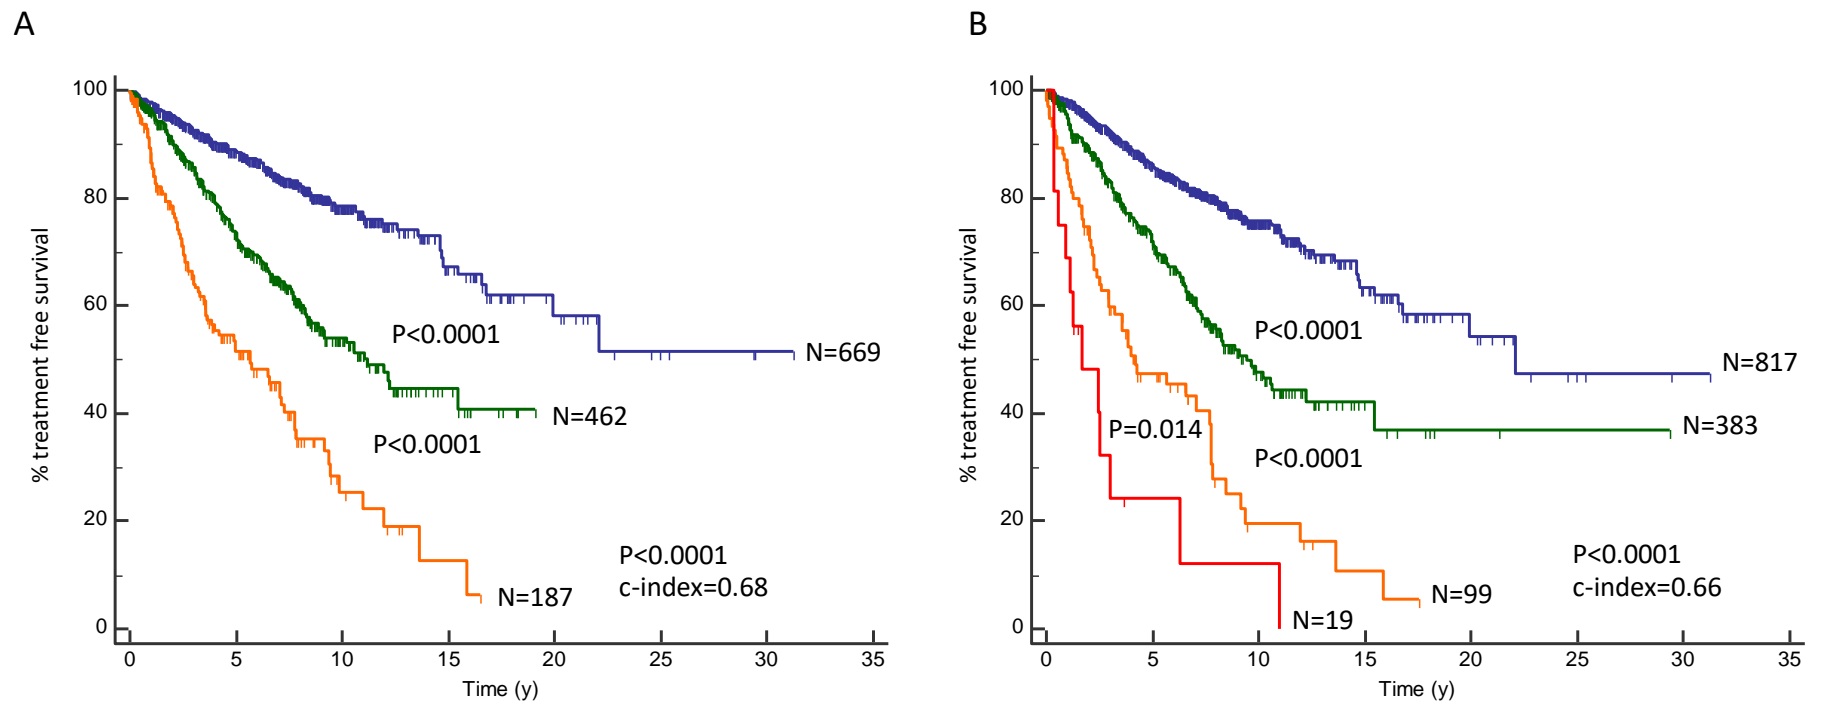

**Supplementary Figure 6. Comparison of CRO score and CLL-IPI in the composite cohort.** Kaplan-Meier curves demonstrating treatment free survival (%; Y-axis) in the composite validation cohort determined by the CRO score (A) and CLL-IPI (B). Blue: low-risk category, green: moderate-risk category, orange: high-risk category, red: very high-risk category (CLL-IPI only).

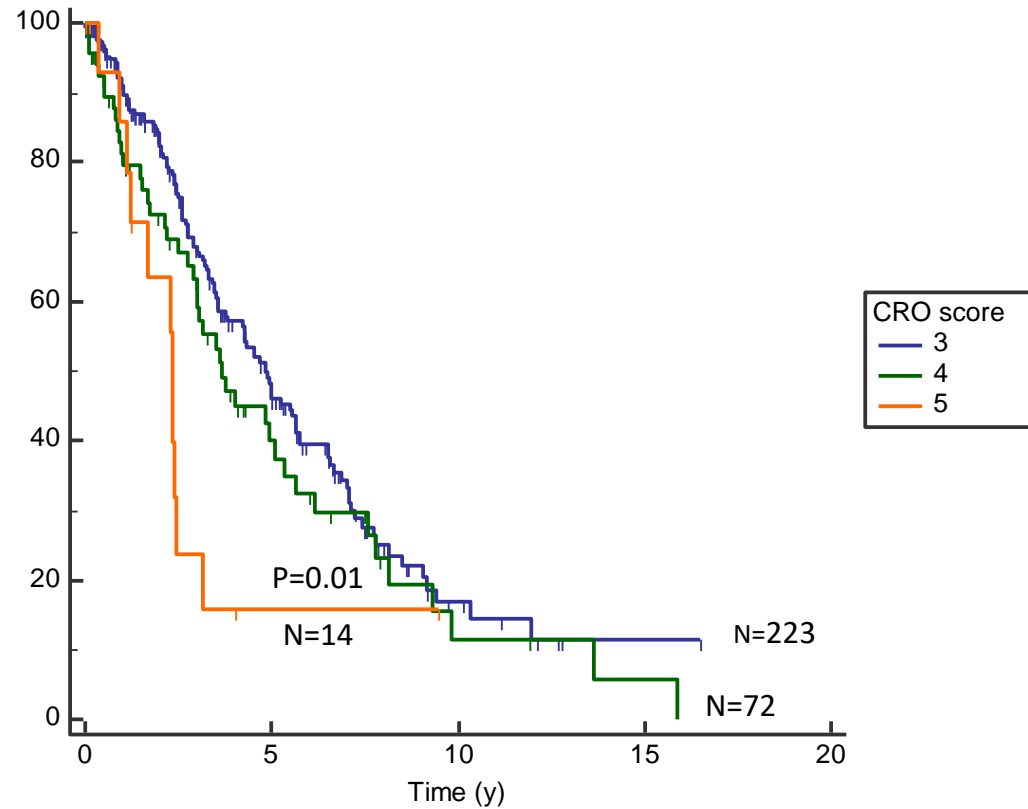

**Supplementary Figure 7. Treatment free survival in all high-risk cases determined according to the CRO score.** Kaplan-Meier curve demonstrating treatment free survival (%; Y-axis) stratified by CRO score in all high risk cases (N=309) taken from the training and validation cohorts.

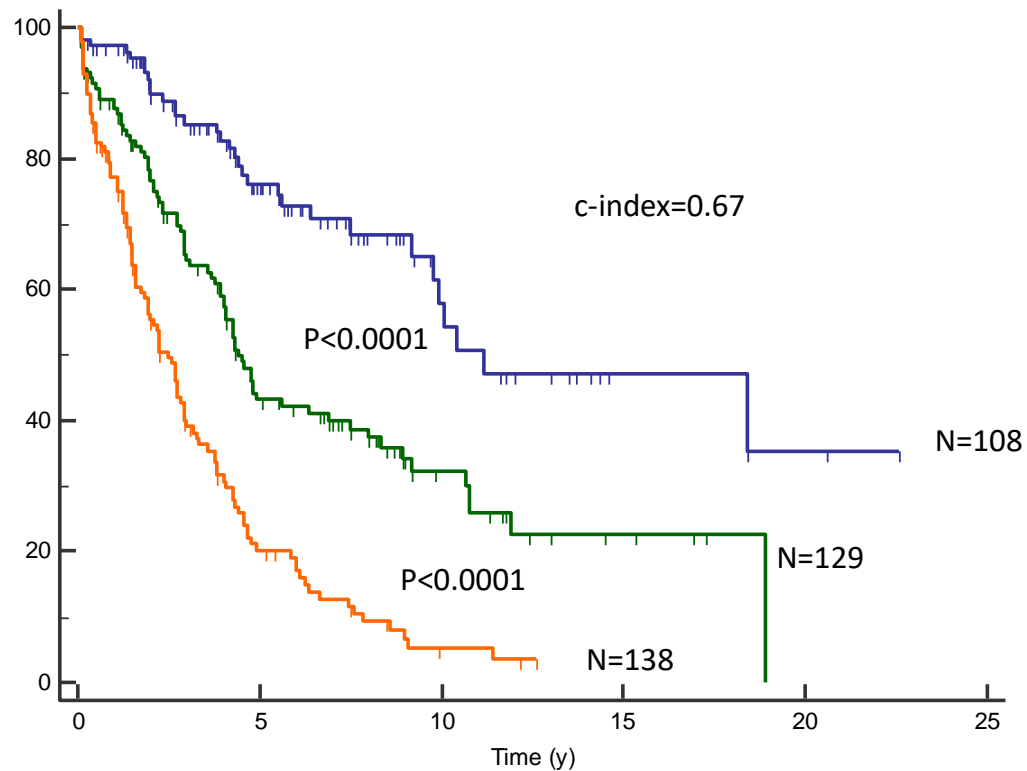

**Supplementary Figure 8. Application of the CRO score in Rai 1 patients.** Kaplan-Meier survival curves demonstrating treatment free survival (%; Y-axis) using the CRO score in Rai I patients applied to a consecutive series of Italian multicenter patients referred to our center for immunocytogenetic analyses between 2006 and 2017. Blue: low-risk category, green: moderate-risk category, orange: high-risk category.
